# Supplementary material
Source: PubMed Central journal article supplement (PMC5293179)

# DIABETES

Hyperglycemia  
Free Fatty Acids

p Ser36  
p66Shc

p53

ROS

miR-34a

Endothelium

Sirt1 mRNA

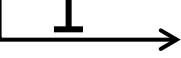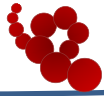

Sirt1 protein

Endothelial Dysfunction

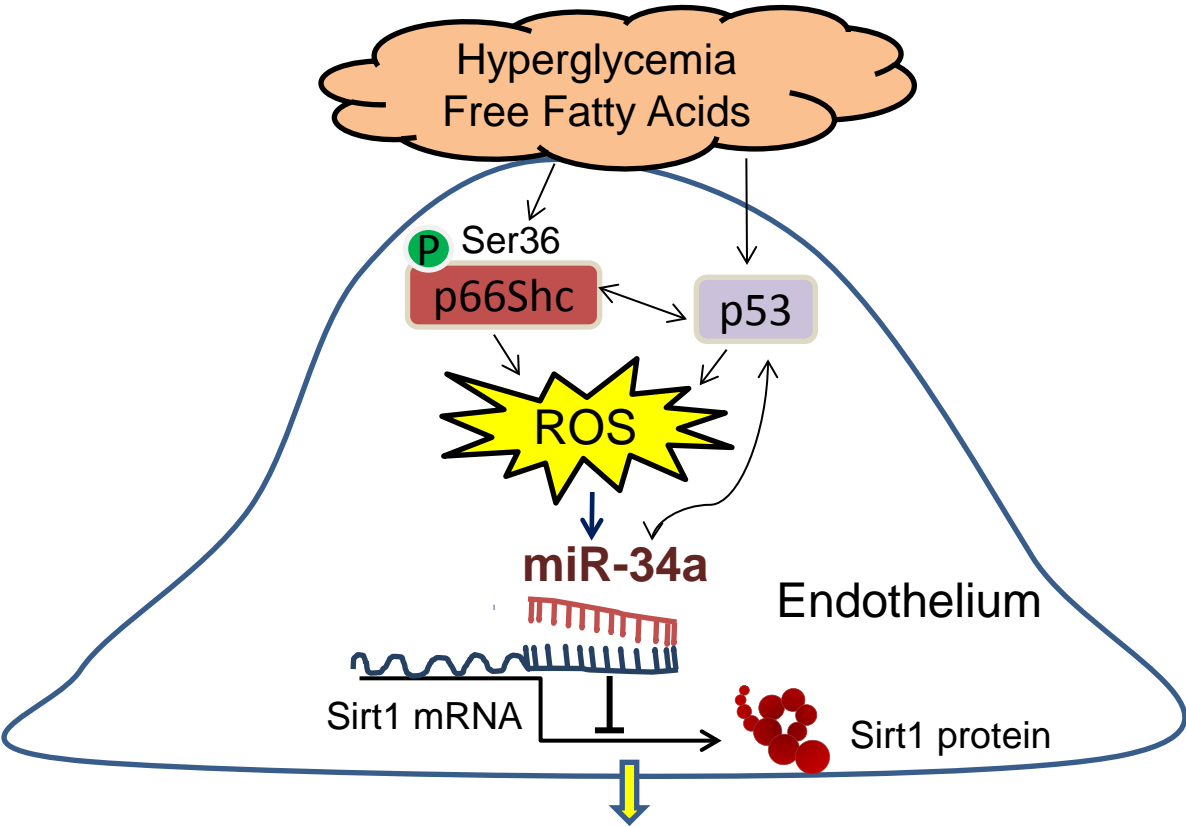

Supplement: NIHMS824162-supplement-Graphic_Abstract.pdf [file NIHMS824162-supplement-Graphic_Abstract.pdf]
